# Supplementary material
Source: publisher figshare collection journal article supplement (https://acs.figshare.com/ndownloader/files/3925765)
Supplement: Supplementary file 1 [file 3925765]

## Supporting Information for

# Tunable optical and photocatalytic performance promoted by nonstoichiometric control and site-selective codoping of trivalent ions in NaTaO<sub>3</sub>

*Yiguo Su,<sup>†</sup> Liman Peng,<sup>†</sup> Jianwei Guo,<sup>†</sup> Shushu Huang,<sup>†</sup> Li, Lv,<sup>‡</sup> Xiaojing Wang<sup>\*‡</sup>*

<sup>†</sup>College of Chemistry and Chemical Engineering, Inner Mongolia University, Hohhot, Inner Mongolia 010021, P. R. China

<sup>‡</sup>Chemical Engineering College of Inner Mongolia University of Technology, Hohhot, Inner Mongolia 010021, P. R. China

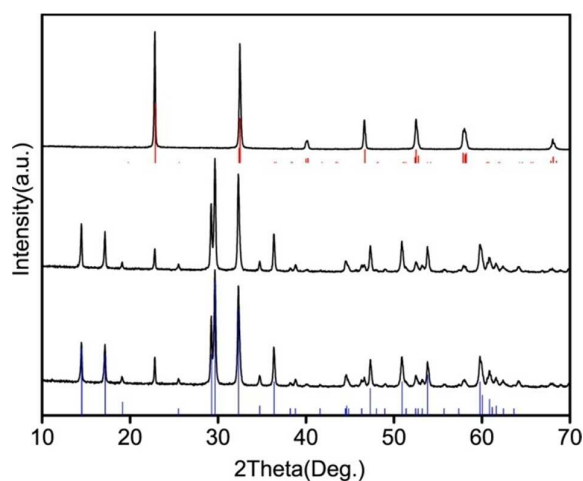

**Figure S1** XRD patterns of Eu<sup>3+</sup> doped NaTaO<sub>3</sub> with different Na/Ta initial molar ratio of 2.5(a), 1.5 (b) and 1 (c). Vertical bars represent the standard diffraction data from JCPDS file for NaTaO<sub>3</sub> (up one, 25-0863) and Na<sub>2</sub>Ta<sub>4</sub>O<sub>11</sub> (down one, 84-0810).

**Table S2** Lattice parameters of pure NaTaO<sub>3</sub> and doped NaTaO<sub>3</sub> based density functional theory (DFT) calculations and experimental data

| Calculated data   | Formula            | Lattice volume<br>(Å <sup>3</sup> ) | a (Å)  | b (Å)  | c (Å)  |
|-------------------|--------------------|-------------------------------------|--------|--------|--------|
|                   | NaTaO <sub>3</sub> | 259.11                              | 5.8636 | 7.9890 | 5.5313 |
|                   | Na <sub>i</sub>    | 272.15                              | 5.7789 | 8.1460 | 5.7813 |
|                   | Nai-Eu@Ta          | 272.49                              | 5.8150 | 8.1442 | 5.7538 |
|                   | Eu@Ta              | 282.75                              | 5.7307 | 8.2399 | 5.9879 |
|                   | Eu@Na              | 270.90                              | 5.6796 | 8.1590 | 5.8462 |
| Selected          | Na/Ta molar        | Lattice volume                      | a (Å)  | b (Å)  | c (Å)  |
| experimental data | ratio              | (Å <sup>3</sup> )                   |        |        |        |
|                   | 1.041              | 235.30                              | 5.5136 | 7.7825 | 5.4842 |
|                   | 1.046              | 235.72                              | 5.4898 | 7.7797 | 5.5190 |

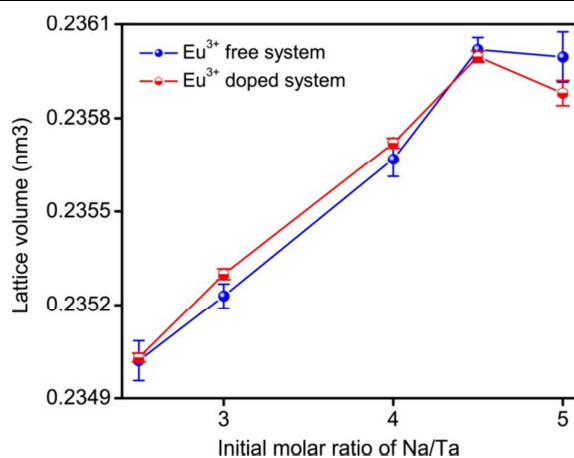

**Figure S3** Lattice volume of Eu<sup>3+</sup> doped and Eu<sup>3+</sup> free NaTaO<sub>3</sub> as a function of Na/Ta initial molar ratio.

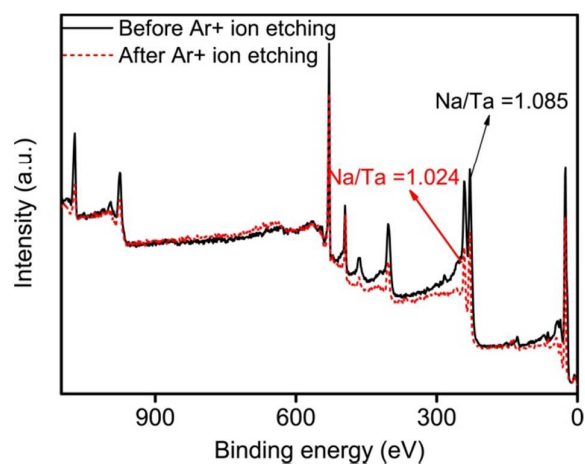

**Figure S4** XPS spectra of  $\text{Eu}^{3+}$  doped  $\text{NaTaO}_3$  with Na/Ta molar ratio of 1.041 before and after  $\text{Ar}^+$  ions etching.

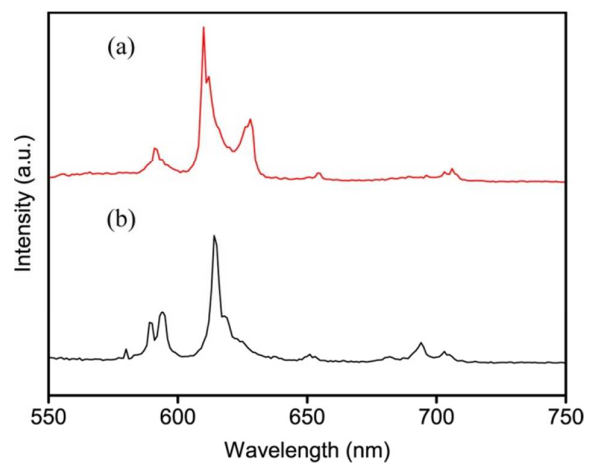

**Figure S5** Emission spectra of surface  $\text{Eu}^{3+}$  doped  $\text{NaTaO}_3$  (a) and  $\text{Eu}^{3+}$  doped  $\text{NaTaO}_3$  with Na/Ta initial molar ratio of 2.5.

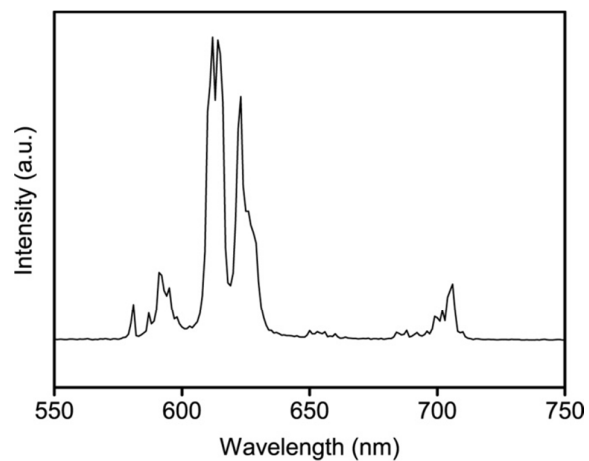

**Figure S6** Emission spectrum of  $\text{Eu}_2\text{O}_3$  under 395 nm excitation.

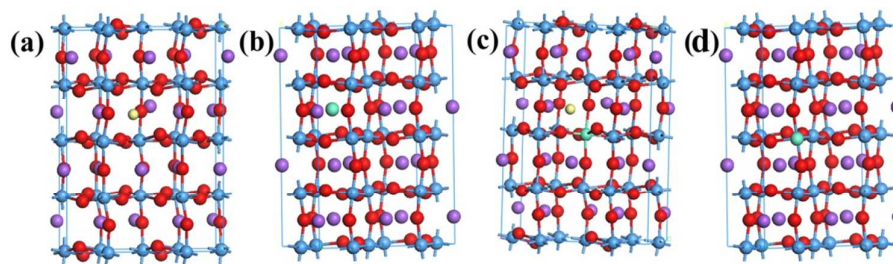

**Figure S7** The supercell model proposed for doped  $\text{NaTaO}_3$ : Na at an interstitial site

(a), Eu at Na site (b), the dual substitute model by substituting Na at interstitial site and Eu at Ta site (c) and Eu at Ta site (d).

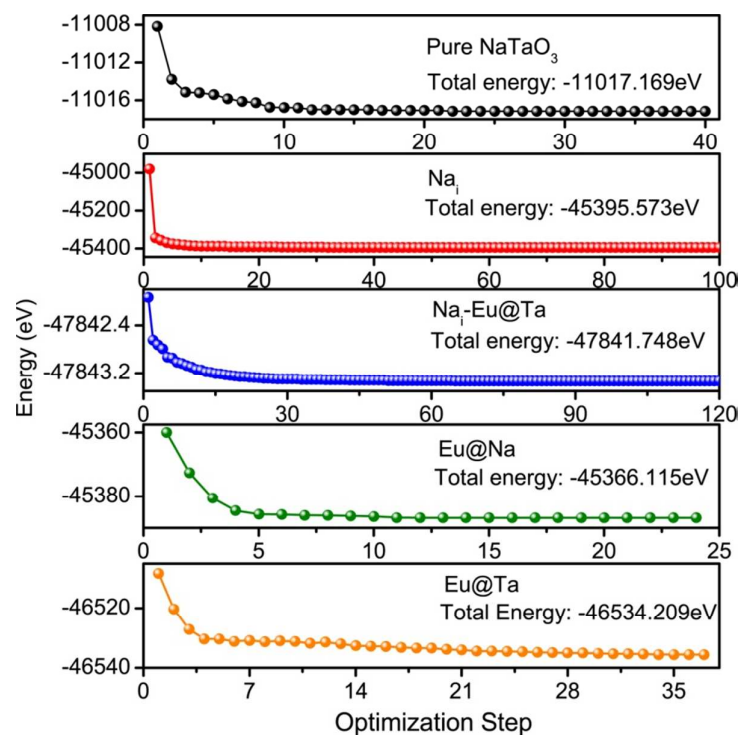

**Figure S8** Total energy and energetic convergence data of all calculated models.

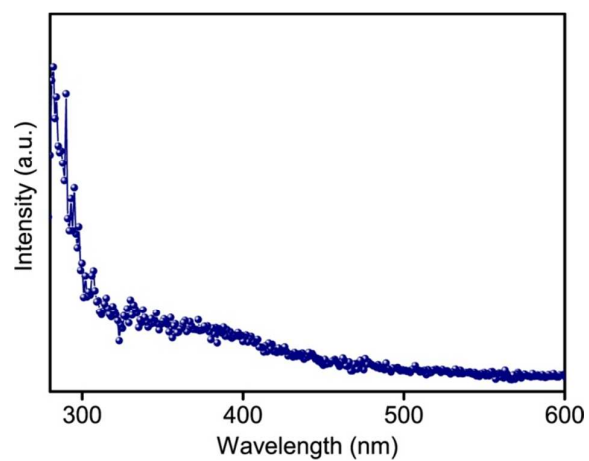

**Figure S9** UV-vis reflectance spectra of undoped NaTaO<sub>3</sub>.

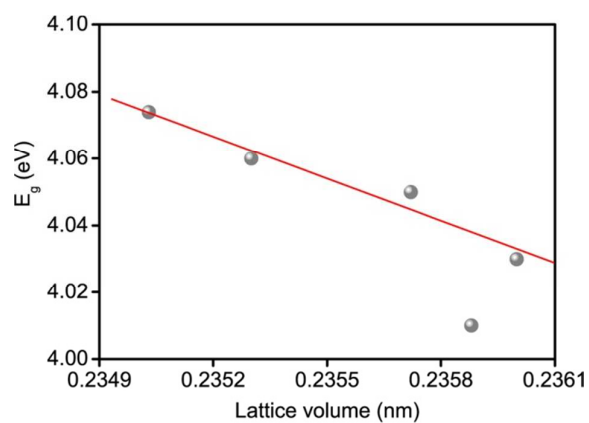

**Figure S10** Correlation between the band gap energies,  $E_g$ , and the lattice volume of Eu<sup>3+</sup> doped NaTaO<sub>3</sub>.

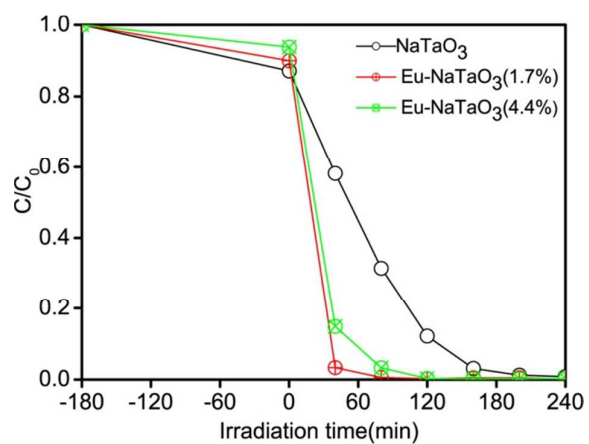

**Figure S11** Normalized concentration of MB versus UV light irradiation time of Eu<sup>3+</sup> doped NaTaO<sub>3</sub> prepared with initial Na/Ta molar ratio of 2.5.

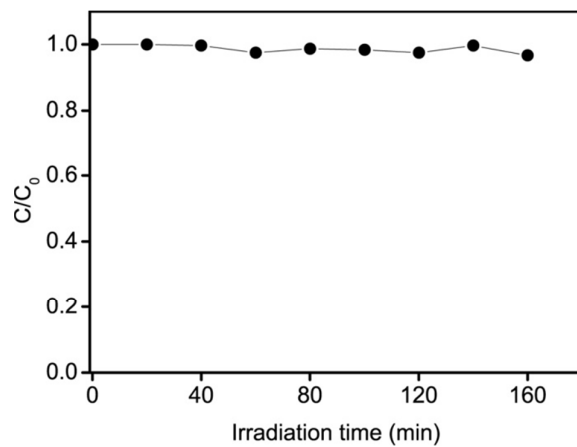

**Figure S12** Normalized concentration of MB versus UV light irradiation time in the absence of  $\text{Eu}^{3+}$  doped  $\text{NaTaO}_3$ .

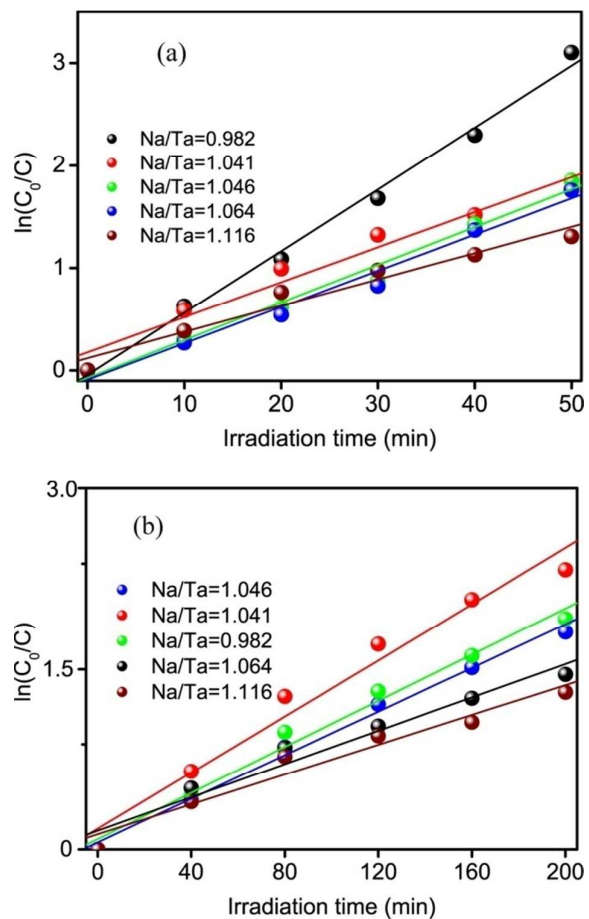

**Figure S13** The  $\ln(C_0/C)$  versus time curves of MB photodegradation over  $\text{Eu}^{3+}$  doped  $\text{NaTaO}_3$  under UV light irradiation (a) and visible light irradiation (b).
